# Supplementary material for: A new platform for development of photosystem I based thin films with superior photocurrent: TCNQ charge transfer salts derived from ZIF-8
Source: Royal Society of Chemistry journal article supplement (doi:10.1039/d0na00220h), 2020-01-01
Supplement: d0na00220h1.pdf [file d0na00220h1.pdf]

SUPPLEMENTAL INFORMATION

**A new platform for development of Photosystem I based thin films with superior photocurrent: TCNQ charge transfer salts derived from ZIF-8**

Tyler H. Bennett, Ravi Pamu, Guang Yang, Dibyendu Mukherjee, and Bamin Khomami

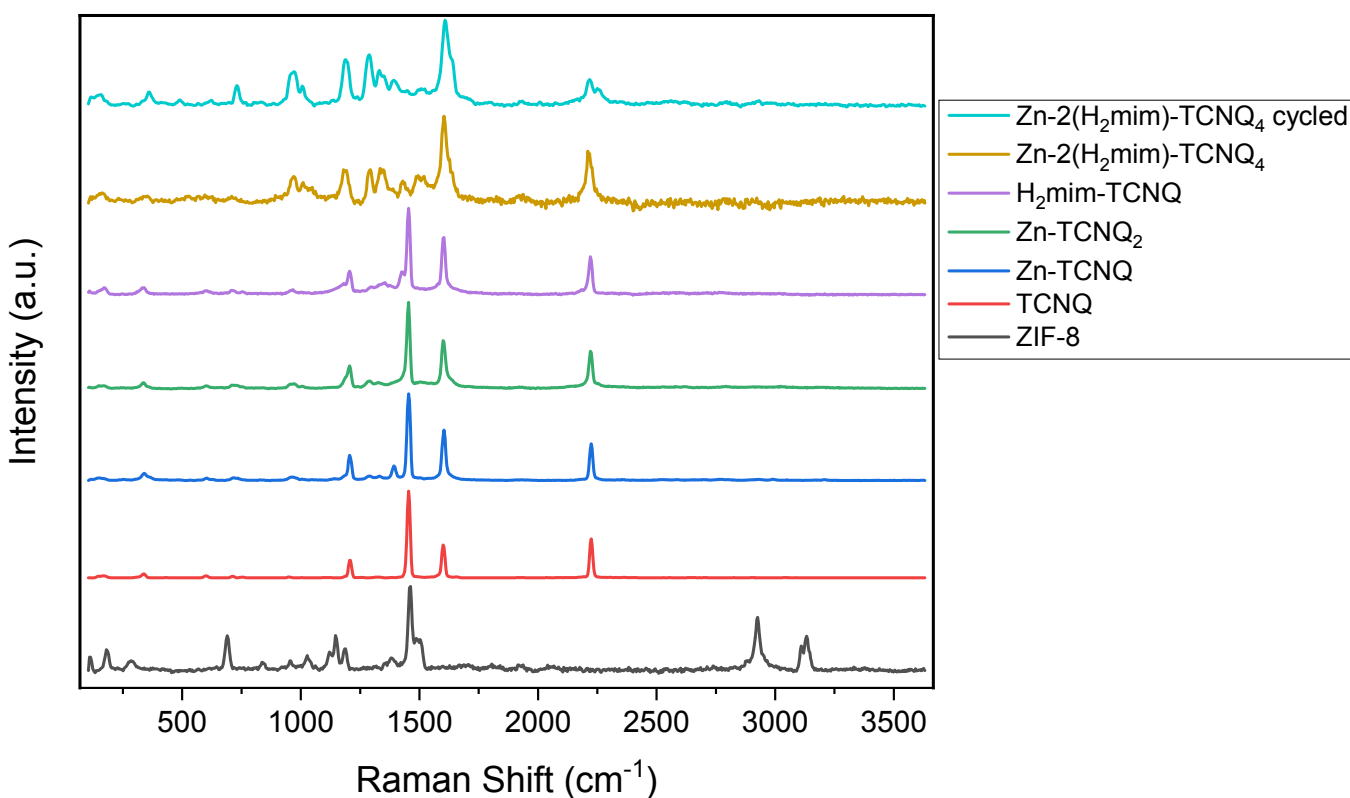

**Figure S1.** Raman spectra for ZIF-8 and the various TCNQ complexes prepared without PSI

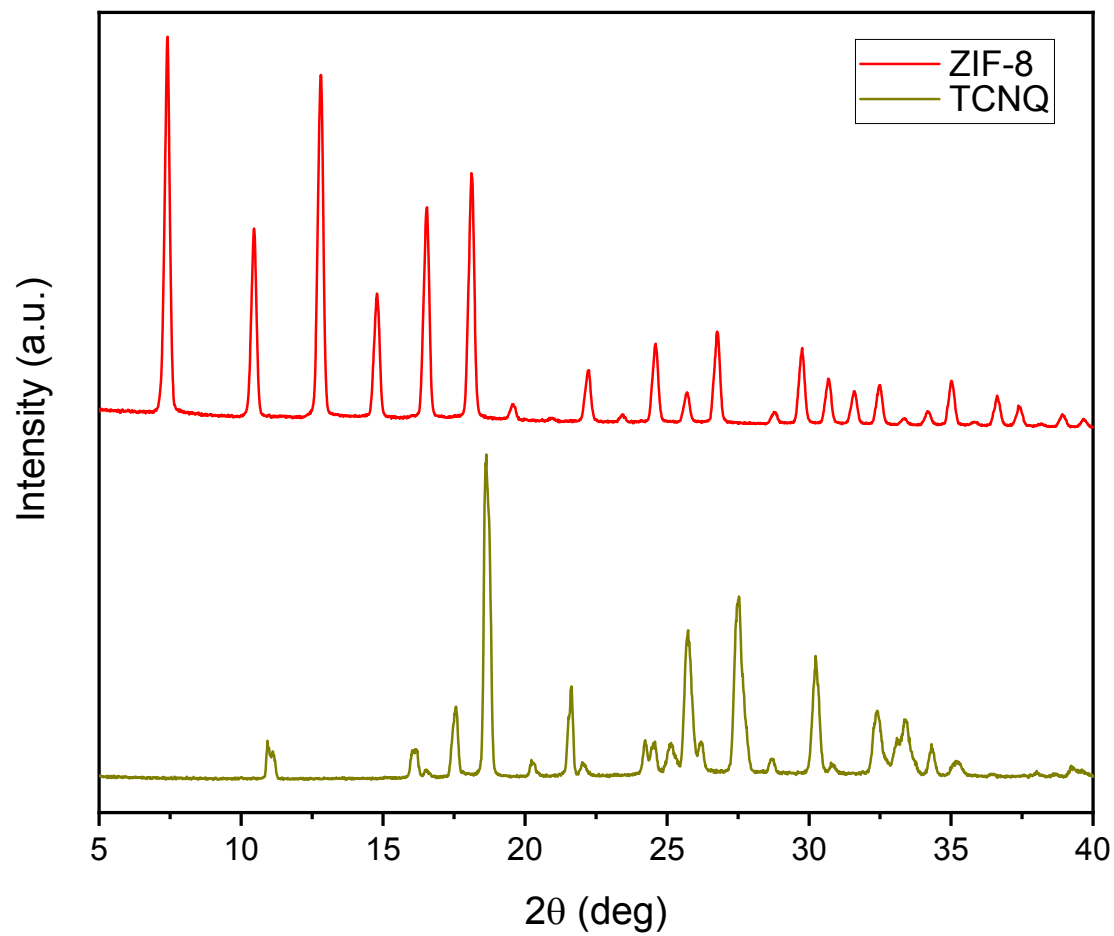

**Figure S2.** XRD patterns for ZIF-8 and neutral TCNQ.
